# Supplementary material for: Broadband emission originating from the stereochemical expression of 6s2 lone pairs in two-dimensional lead bromide perovskites
Source: Royal Society of Chemistry journal article supplement (doi:10.1039/d3dt01627g), 2023-01-01
Supplement: d3dt01627g1.pdf [file d3dt01627g1.pdf]

*Supporting information for*

**Broadband Emission Originated from the Stereochemical  
Expression of 6s<sup>2</sup> Lone Pairs in Two-Dimensional Lead  
Bromide Perovskites**

*Xiaofan Jiang<sup>1, 2</sup>, Yu Tao<sup>1</sup>, Jiazhen Gu<sup>1</sup>, Leyang Jin<sup>1</sup>, Chen Li<sup>1</sup>, Wenkai Zhang<sup>2</sup>\*, and  
Yongping Fu<sup>1</sup>\**

<sup>1</sup> Beijing National Laboratory for Molecular Science, State Key Laboratory of Rare Earth Materials Chemistry and Applications, College of Chemistry and Molecular Engineering, Peking University, Beijing 100871, China

<sup>2</sup> Department of Physics and Applied Optics Beijing Area Major Laboratory, Center for Advanced Quantum Studies, Beijing Normal University, Beijing 100875, China

\* Corresponding author: Email: [wkzhang@bnu.edu.cn](mailto:wkzhang@bnu.edu.cn), [yfu@pku.edu.cn](mailto:yfu@pku.edu.cn)

**Experimental section**

**Starting Materials.** PbBr<sub>2</sub> (99.0%, Aladdin), HBr (48 wt.% in H<sub>2</sub>O, Energy Chemical), 4-chlorophenylammonium (99%, Adamas-beta), benzylammonium (99%, Adamas-beta), 4-aminotetrahydropyran (98% *Bide Pharmatech Co., Ltd.*).

**Synthesis of (PMA)<sub>2</sub>PbBr<sub>4</sub> and (ATHP)<sub>2</sub>PbBr<sub>4</sub>.** Single-crystal (PMA)<sub>2</sub>PbBr<sub>4</sub> and (ATHP)<sub>2</sub>PbBr<sub>4</sub> were synthesized by the widely used cooling-induced crystallization method. Specially, 1.0 mmol PbBr<sub>2</sub> and 2.0 mmol benzylammonium or 2.0 mmol 4-aminotetrahydropyran were added into a 15 mL reaction vial containing 2 mL HBr aqueous solution. The reaction vial was then placed in a 100°C water bath to dissolve the solids until a clear solution was obtained. By turning off the heating of the water bath, the solution was naturally cooled down to room temperature, and colorless flake-like crystals precipitated.

**Synthesis of (4ClPA)<sub>2</sub>PbBr<sub>4</sub>.** Single-crystal (4ClPA)<sub>2</sub>PbBr<sub>4</sub> was synthesized by solvent volatilization method. Specially, 1.0 mmol PbBr<sub>2</sub> and 2.0 mmol 4-chlorophenylammonium were added into a 15 mL reaction vial containing 8 mL HBr

aqueous solution. The reaction vial was then placed on a hot plate at 100°C to dissolve the solids until a clear solution was obtained. Subsequently, the temperature of the hot plate was lowered to 60 °C, and the solution was left on the hot plate to slowly evaporate the solvent. Colorless rectangular crystals precipitated within three days.

**Single-crystal X-ray Crystallography.** The single-crystal X-ray diffraction data were collected on a Rigaku XtalLAB Synergy diffractometer with Cu-K $\alpha$  radiation ( $\lambda = 1.54184 \text{ \AA}$ ). Olex2-1.5 software was used to solve and refine the crystal structure of  $(4\text{CIPA})_2\text{PbBr}_4$ . The CCDC reference number is 2264136.

**Optical Characterizations.** Temperature-dependent photoluminescence emission (PL) and excitation spectra (PLE) of the three bulk single crystals were measured using a NanoLog infrared fluorescence spectrometer. The monitored emission wavelengths on the PLE measurements were 470, 560, and 550 nm for  $(\text{PMA})_2\text{PbBr}_4$ ,  $(\text{ATHP})_2\text{PbBr}_4$ , and  $(4\text{CIPA})_2\text{PbBr}_4$ , respectively. The excitation wavelengths on the PL measurements were 300, 330, and 330 nm, respectively. The polarization-resolved low-frequency Raman spectra were performed on a homebuilt microscope setup with a 633 nm He–Ne laser (N-LHP-925, Newport) as the excitation source, as described in our previous work<sup>1</sup>. The scheme of the Raman measurement is shown in Fig. S7. The excitation laser was filtered from undesirable amplified spontaneous emission using a volume Bragg grating (VBG) bandpass filter (Optigrate, linewidth: 5  $\text{cm}^{-1}$ ), and then was focused onto the sample by a long working distance  $\times 50$  objective (NA 0.4, Nikon). The Raman signal was collected with the same objective and focused into a spectrograph (Princeton Instruments, HRS-300S) and detected by a liquid-nitrogen-cooled charge-coupled device camera (Princeton Instruments, PyLoN-400BRX). To minimize the Rayleigh scattered light, the collected signal was sent through the VBG reflecting filter and passed through three VBG notch filters (Optigrate, OD > 3) before being dispersed in the spectrograph.

**Density functional theory (DFT) calculations.** We calculated the electronic band structures of  $(\text{PMA})_2\text{PbBr}_4$ ,  $(\text{ATHP})_2\text{PbBr}_4$ , and  $(4\text{CIPA})_2\text{PbBr}_4$  using the Vienna Ab initio Simulation Package (VASP)<sup>2</sup>. The Kohn-Sham density functional theory (KS-DFT) was implemented using a planewave basis set and the projector augmented wave

(PAW) formalism<sup>3</sup> with a cutoff energy of 400 eV. Exchange and correlation were treated with the Perdew–Burke–Ernzerhof (PBE)<sup>4</sup> functional. The VASPKIT package<sup>5</sup> and VESTA program<sup>6</sup> were used in the pre- and post-processing of our computations. To investigate the relations between the localized Pb 6s<sup>2</sup> electron pair and *sp* hybridization, we further calculated the electron localization function (ELF), projected density of states (PDOS), and integrated projected density of states (IPDOS) of the three structures. To obtain a quantitative description of the strength of *sp* hybridization, we calculated the percentage of 6*p* component in the first peak of DOS below Fermi level, defined as

$$\text{Percentage of } 6p \text{ component} = \frac{IPDOS_p}{IPDOS_s + IPDOS_p},$$

where the IPDOS are integrated from -0.1 eV to 0 eV for (PMA)<sub>2</sub>PbBr<sub>4</sub> and (ATHP)<sub>2</sub>PbBr<sub>4</sub>, and from -0.2 eV to 0 eV for (4CIPA)<sub>2</sub>PbBr<sub>4</sub>, respectively.

**The fits of unpolarized low-frequency Raman spectra.** The Raman spectrum was deconvolved to a product of the Bose-Einstein distribution and a sum of a Debye relaxational term and multiple Lorentz oscillator terms, which is expressed as<sup>[6]</sup>:

$$I(\nu, \nu_i, \Gamma_i) = \left( \frac{1}{\exp\left(\frac{h\nu}{k_B T}\right) - 1} + 1 \right) \left[ \frac{c_0 \nu \Gamma_0}{\nu^2 + \Gamma_0^2} + \sum_{i=1}^n c_i \frac{\nu \nu_i \Gamma_i^2}{\nu^2 \Gamma_i^2 + (\nu^2 - \nu_i^2)^2} \right] \#$$

where  $h$  is the Planck constant,  $k_B$  is the Boltzmann constant,  $T = 298 \text{ K}$  is the temperature,  $\nu$  is the spectral shift,  $\nu_i$  is the resonance energies of the Stokes Raman modes,  $\Gamma_0$  and  $\Gamma_i$  are the damping coefficients of the Debye component (the first term in the bracket) and the Lorentz components (the second term in the bracket),  $c_0$  and  $c_i$  are the fitting parameters for the intensities of the Debye and Lorentz components, respectively. The fitting results of both Debye and Lorentz components and the fitted peak positions ( $\nu_i$ ) and widths ( $\Gamma_i$ ) are summarized in Table S4.

## Supporting figures

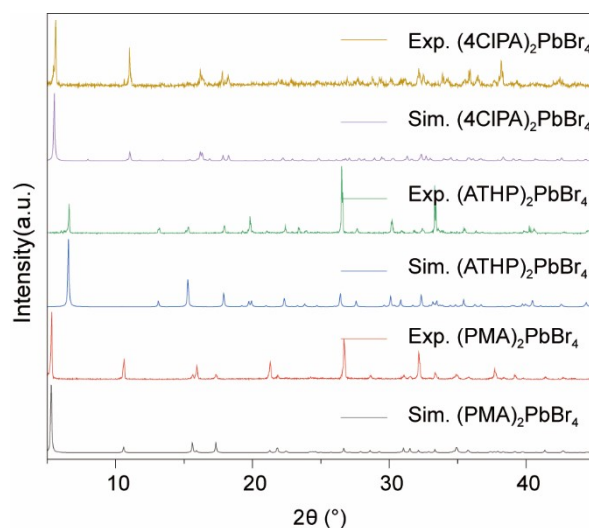

**Fig. S1** Powder X-ray diffraction (PXRD) patterns of  $(\text{PMA})_2\text{PbBr}_4$ ,  $(\text{ATHP})_2\text{PbBr}_4$ , and  $(4\text{CIPA})_2\text{PbBr}_4$ .

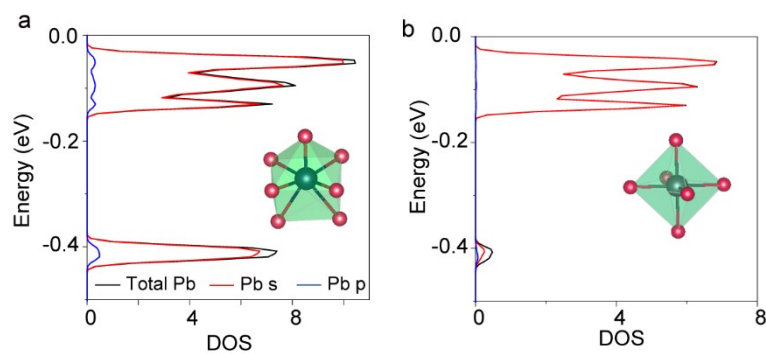

**Fig. S2** Orbital projected density of states for Pb s and Pb p contributions in the (a) capped octahedra and (b) regular octahedra of  $(4\text{CIPA})_2\text{PbBr}_4$ .

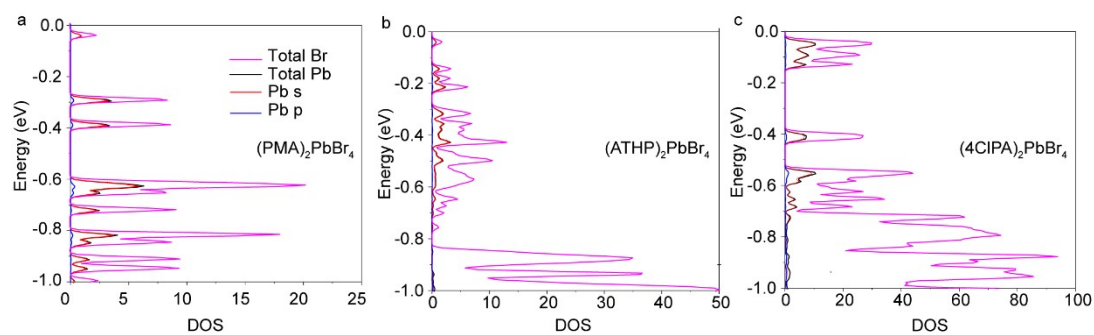

**Fig. S3** Orbital projected density of states for Pb and Br contributions in the (a)  $(\text{PMA})_2\text{PbBr}_4$ , (b)  $(\text{ATHP})_2\text{PbBr}_4$ , and (c)  $(4\text{CIPA})_2\text{PbBr}_4$

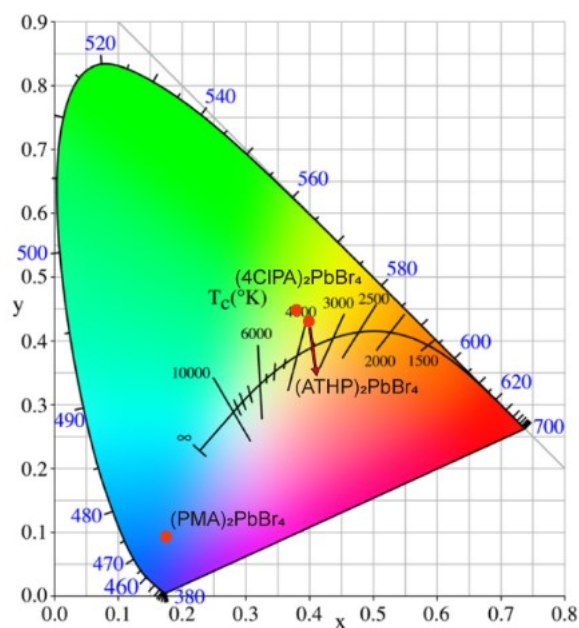

**Fig. S4** CIE color coordinates of  $(\text{PMA})_2\text{PbBr}_4$ ,  $(\text{ATHP})_2\text{PbBr}_4$ , and  $(4\text{ClPA})_2\text{PbBr}_4$ .

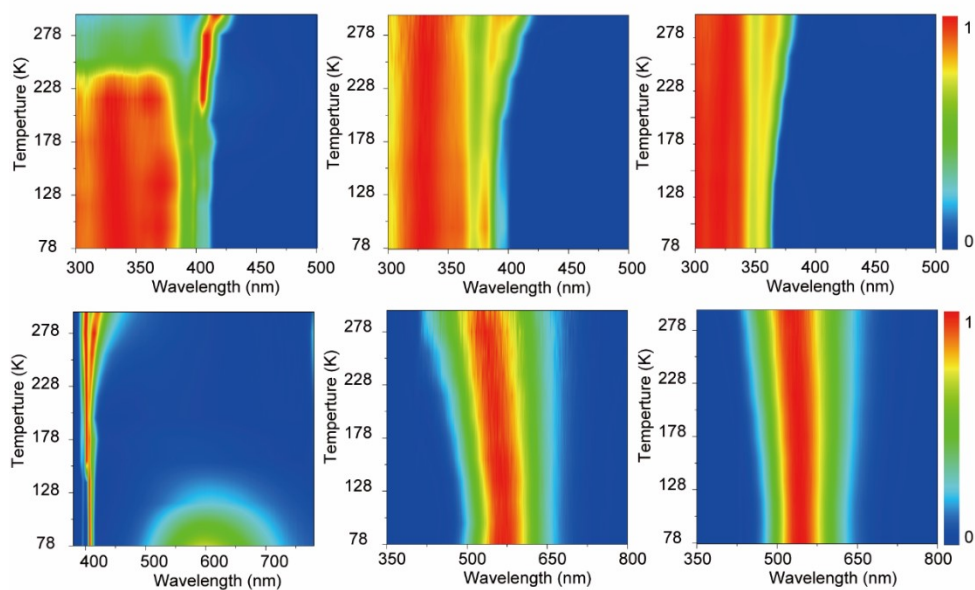

**Fig. S5** Temperature-dependent PLE spectra of (a)  $(\text{PMA})_2\text{PbBr}_4$ , (b)  $(\text{ATHP})_2\text{PbBr}_4$ , and (c)  $(4\text{ClPA})_2\text{PbBr}_4$ . The monitored emission wavelengths on the PLE measurements were 470, 560, and 550 nm, respectively. Temperature-dependent of PL spectra of (d)  $(\text{PMA})_2\text{PbBr}_4$ , (e)  $(\text{ATHP})_2\text{PbBr}_4$ , and (f)  $(4\text{ClPA})_2\text{PbBr}_4$ .

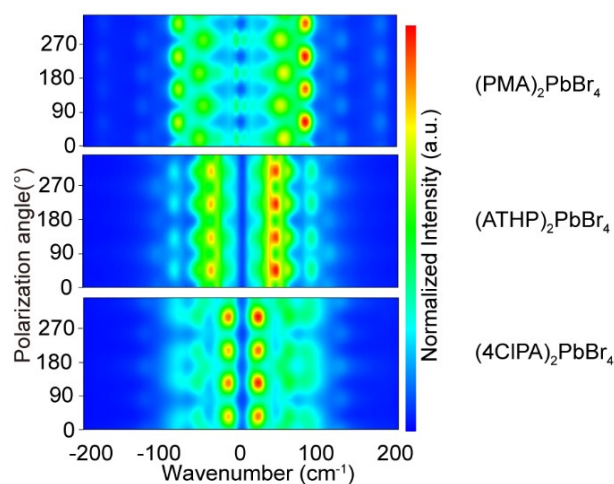

**Fig. S6** Polarization-resolved low-frequency Raman spectra of  $(\text{PMA})_2\text{PbBr}_4$ ,  $(\text{ATHP})_2\text{PbBr}_4$ , and  $(\text{4CIPA})_2\text{PbBr}_4$ . The dominant Raman peak shifts to lower energy in the sequence of  $(\text{PMA})_2\text{PbBr}_4$ ,  $(\text{ATHP})_2\text{PbBr}_4$ , and  $(\text{4CIPA})_2\text{PbBr}_4$ . The polarization of the analyzer is set to be perpendicular to the incident laser polarization.

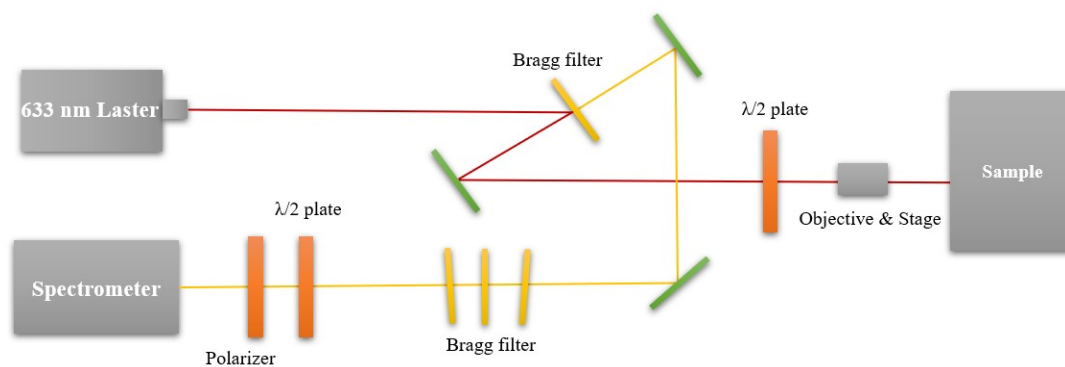

**Fig. S7** Scheme of the polarization-resolved Raman measurement.

## Supporting Tables

**Table S1.** Crystal Structure Refinement of (4CIPA)<sub>2</sub>PbBr<sub>4</sub>

| Structure                                                                  | (4CIPA) <sub>2</sub> PbBr <sub>4</sub>                                                      |
|----------------------------------------------------------------------------|---------------------------------------------------------------------------------------------|
| Empirical formula                                                          | C <sub>12</sub> N <sub>2</sub> H <sub>14</sub> Br <sub>4</sub> Cl <sub>2</sub> Pb           |
| Crystal system                                                             | Monoclinic                                                                                  |
| Space group                                                                | <i>P</i> 2 <sub>1</sub> / <i>c</i>                                                          |
| Unit cell dimensions                                                       | a = 16.6366(7) Å, α = 90°<br>b = 8.0081(4) Å, β = 105.410(4)°<br>c = 23.0142(10) Å, γ = 90° |
| Volume                                                                     | 2955.9(2) Å <sup>3</sup>                                                                    |
| Z                                                                          | 6                                                                                           |
| Index ranges                                                               | -16 ≤ h ≤ 19,<br>-7 ≤ k ≤ 9,<br>-25 ≤ l ≤ 27                                                |
| Independent reflections                                                    | 14358 [R <sub>int</sub> = 0.0715]                                                           |
| Completeness to θ = 29.41°                                                 | 99.8 %                                                                                      |
| Data / restraints / parameters                                             | 5187 / 79 / 290                                                                             |
| Goodness-of-fit                                                            | 1.054                                                                                       |
| R <sub>1</sub> <sup>[a]</sup> , wR <sub>2</sub> <sup>[b]</sup> [I > 2σ(I)] | 0.0565, 0.1366                                                                              |
| R <sub>1</sub> , wR <sub>2</sub> [all data]                                | 0.0738, 0.1510                                                                              |
| Largest diff. peak and hole                                                | 6.709 and -4.728 e·Å <sup>-3</sup>                                                          |

$$^{[a]}R = \frac{\sum ||F_o| - |F_c||}{\sum |F_o|}$$

$$^{[b]}wR = \left\{ \frac{\sum [w(|F_o|^2 - |F_c|^2)^2]}{\sum [w(|F_o|^2)^2]} \right\}^{1/2}$$

$$w = 1 / [\sigma^2(F_o^2) + (0.0833P)^2 + 3.5012P] \text{ where } P = (F_o^2 + 2F_c^2) / 3.$$

**Table S2.** Comparison of the structural and optical properties in (4ClPA)<sub>2</sub>PbBr<sub>4</sub> and (4BrPA)<sub>2</sub>PbBr<sub>4</sub>

| Structure/comparison                                                   | (4ClPA) <sub>2</sub> PbBr <sub>4</sub> |           | (4BrPA) <sub>2</sub> PbBr <sub>4</sub> |           |
|------------------------------------------------------------------------|----------------------------------------|-----------|----------------------------------------|-----------|
|                                                                        | Capped octahedra                       | Octahedra | Capped octahedra                       | Octahedra |
| Average Pb-Br bond length (Å)                                          | 3.106                                  | 2.967     | 3.109                                  | 2.967     |
| Average quadratic elongation ( $\langle\lambda\rangle$ )               | -                                      | 1.0015    | -                                      | 1.0005    |
| Average bond angle variance ( $\sigma_{\theta}^2$ , deg <sup>2</sup> ) | -                                      | 0         | -                                      | 0         |
| Interlayer distance (Å)                                                | 10.043                                 |           | 10.327                                 |           |
| PL emission peak (eV)                                                  | 2.26                                   |           | 2.21                                   |           |
| Excitonic peak (eV)                                                    | 3.39                                   |           | 3.42                                   |           |

**Table S3.** Comparison of the structural and optical in (ATHP)<sub>2</sub>PbBr<sub>4</sub>, (4-AMP)<sub>2</sub>PbBr<sub>4</sub> and (CHA)<sub>2</sub>PbBr<sub>4</sub>

| Structure/comparison                         | (ATHP) <sub>2</sub> PbBr <sub>4</sub> | (4-AMP) <sub>2</sub> PbBr <sub>4</sub> <sup>8</sup> | (CHA) <sub>2</sub> PbBr <sub>4</sub> <sup>9</sup> |
|----------------------------------------------|---------------------------------------|-----------------------------------------------------|---------------------------------------------------|
| Average Pb-Br-Pb angle (out-of-plane) (deg)* | 180                                   | 180                                                 | 180                                               |
| Average Pb-Br-Pb angle (in-plane) (deg)      | 150                                   | 153.24                                              | 152.09                                            |
| FWHM (nm)                                    | 106                                   | ~107                                                | ~153                                              |
| PL emission peak (eV)                        | 2.16                                  | 2.38                                                | 2.05                                              |

\* All the three structures exhibit no out-of-plane distortion, but they exhibit broadband emission.



**Table S4.** Fitting parameters  $c_0$ ,  $c_i$ s and peak widths  $\Gamma_0$ ,  $\Gamma_i$ s of the fitted Raman spectra of  $(\text{PMA})_2\text{PbBr}_4$ ,  $(\text{ATHP})_2\text{PbBr}_4$  and  $(4\text{CIPA})_2\text{PbBr}_4$ .

| LA cation | Debye component |                                | Lorentz component           |       |                                |
|-----------|-----------------|--------------------------------|-----------------------------|-------|--------------------------------|
|           | $c_0$           | $\Gamma_0$ (cm <sup>-1</sup> ) | $\nu_i$ (cm <sup>-1</sup> ) | $c_i$ | $\Gamma_i$ (cm <sup>-1</sup> ) |
| PMA       | 455             | 24.6                           | 56                          | 3656  | 28.1                           |
|           |                 |                                | 81                          | 4179  | 19.0                           |
|           |                 |                                | 127                         | 1088  | 19.6                           |
|           |                 |                                | 177                         | 1179  | 33.6                           |
| ATHP      | 646             | 109.8                          | 35                          | 1099  | 12.2                           |
|           |                 |                                | 50                          | 2583  | 26.4                           |
|           |                 |                                | 87.8                        | 998   | 12.3                           |
|           |                 |                                | 110.0                       | 915   | 44.6                           |
| PMA       | 1237            | 79.5                           | 20                          | 857   | 12.6                           |
|           |                 |                                | 27                          | 976   | 17.0                           |
|           |                 |                                | 57                          | 2036  | 24.4                           |
|           |                 |                                | 83                          | 2995  | 33.6                           |
|           |                 |                                | 125                         | 1078  | 30.0                           |

## References

- 1 X. Huang, X. Li, Y. Tao, S. Guo, J. Gu, H. Hong, Y. Yao, Y. Guan, Y. Gao, C. Li, X. Lü and Y. Fu, *J. Am. Chem. Soc.*, 2022, **144**, 12247–12260.
- 2 G. Kresse and J. Furthmüller, *Phys. Rev. B*, 1996, **54**, 11169–11186.
- 3 P. E. Blöchl, *Phys. Rev. B*, 1994, **50**, 17953–17979.
- 4 J. P. Perdew, K. Burke and M. Ernzerhof, *Phys. Rev. Lett.*, 1996, **77**, 3865–3868.
- 5 V. Wang, N. Xu, J.-C. Liu, G. Tang and W.-T. Geng, *Comput. Phys. Commun.*,

- 2021, **267**, 108033.
- 6 K. Momma and F. Izumi, *J. Appl. Crystallogr.*, 2011, **44**, 1272–1276.
  - 7 L. Gao, L. Yadgarov, R. Sharma, R. Korobko, K. M. McCall, D. H. Fabini, C. C. Stoumpos, M. G. Kanatzidis, A. M. Rappe and O. Yaffe, *Mater. Adv.*, 2021, **2**, 4610–4616.
  - 8 L. Mao, P. Guo, M. Kepenekian, I. Hadar, C. Katan, J. Even, R. D. Schaller, C. C. Stoumpos and M. G. Kanatzidis, *J. Am. Chem. Soc.*, 2018, **140**, 13078–13088.
  - 9 A. Yangui, D. Garrot, J. S. Lauret, A. Lusson, G. Bouchez, E. Deleporte, S. Pillet, E. E. Bendeif, M. Castro, S. Triki, Y. Abid and K. Boukheddaden, *J. Phys. Chem. C*, 2015, **119**, 23638–23647.
